# Supplementary material for: Characterization of common marmoset dysgerminoma-like tumor induced by the lentiviral expression of reprogramming factors
Source: PubMed Central journal article supplement — Cancer Sci. 2014 Apr 5;105(4):402–8. doi: 10.1111/cas.12367 (PMC4317795; doi:10.1111/cas.12367), 2014-04-05
Supplement: cas0105-0402-SD16.pdf [file cas0105-0402-SD16.pdf]

## **Supporting Materials and Methods**

### **Cell culture, induction of reprogramming and proliferation assay**

AGM fibroblast cell line was established from embryos at around 60 days post-fertilization by E. Sasaki (Tokyo University) and K. Tani (Kyushu University). Lentiviral 293T LTV cells (Cell Biolabs, San Diego, CA, USA), HeLa cells (American Type Culture Collection, Manassas, VA, USA) and mouse embryonic fibroblast (MEFs) feeder cells were maintained in DMEM (Sigma Aldrich) containing 10% FBS. KG-1a (Ozawa, Tokyo University) and HUT (American Type Culture Collection) cells were maintained in RPMI (Sigma Aldrich) containing 10% FBS.

To induce reprogramming of AGM fibroblasts, cells were seeded at  $3 \times 10^4$  cells per well on 6-well plates (BD Biosciences). At 24 h after seeding, fibroblasts were transduced with lentiviruses ( $1.2 \times 10^6$  IU). One week after transduction, cells were trypsinized and transferred onto MEFs. Colonies formed 1-2 weeks after transfer, and individual colonies were picked manually and transferred to new MEF layers maintained on gelatin-coated 24-well plates (BD Biosciences).

To investigate the proliferation, cells ( $3 \times 10^4$ ) were seeded on 24-well plates. The following day (day 0), they were cultured in 10% FBS/DMEM in the presence of recombinant human bFGF (PeproTech, Rocky Hill, NJ, USA) at 5-45 ng/ml. Cell numbers were counted on days 2, 4 and 6 using the TC10™ Automated Cell Counter (Bio-Rad, Hercules, CA, USA).

bFGF signaling was inhibited using FGFR inhibitor

1-4, BGJ398(3-(2,6-dichloro-3,5-dimethoxyphenyl)-1-(6-(4-(4-ethylpiperazin-1-yl)phenylamino)pyrimidin-4-yl)-1-methylurea ; Selleck Chemicals, Houston, TX, USA) in the presence of bFGF.

### **Immunocytochemistry and Alkaline phosphatase (AP) staining**

Cells were fixed with 4% paraformaldehyde/PBS for 20 min at room temperature, and stained

with primary antibodies against TRA1-60 (Santa Cruz Biotechnology, Dallas, TX, USA) overnight at 4°C. The samples were then incubated with secondary antibodies against Alexa 633 anti-mouse IgG (Invitrogen, Carlsbad, CA, USA). The stained cells were visualized by confocal microscopy (Axiovert 135M, Zeiss, Deutschland, Germany). AP staining of ARCs was performed using a Leukocyte Alkaline Phosphatase kit, according to the manufacturer's protocols (Sigma-Aldrich).

### **Karyotype analysis**

CM ARC lines were subjected to karyotype analysis using a modified Q-banding technique<sup>(1)</sup>. Briefly, iPSCs were cultured in medium containing 100 ng/ml colcemid (Invitrogen) for 90 min, washed in PBS, dissociated using trypsin-EDTA solution, and spun down. Chromosome slides were stained with 0.01 µg/ml Hoechst 33258 (Sigma Aldrich) for 5 min followed by 5.0 g/ml quinacrine mustard (Sigma Aldrich) for 20 min. The stained slides were mounted and observed under a fluorescence microscope (DMRXA2, Leica, Wetzlar, Germany) and analyzed using CW4000 software (Leica).

### ***In vivo* tumorigenicity assay and immunohistochemistry**

All procedures and animal care were approved by the Committee on Ethics of Animal Experiments, Faculty of Medicine, Kyushu University, and were conducted according to the Guidelines for Animal Experiments of Faculty of Medicine, Kyushu University. The tumorigenicity of ARCs and CM DGs was evaluated *in vivo* by transplanting  $1 \times 10^6$  cells into the testes or subcutaneous tissues of SCID mice (CB17/Icr-Prkdcscid/CrlCrlj; Charles River, Kanagawa, Japan). 6 weeks after injection, tumors were dissected and fixed with 4% paraformaldehyde/PBS, and paraffin-embedded. For pathological analyses, 3-µm tissue sections were cut, deparaffinized and stained with H&E or antibodies to low- and high-molecular weight cytokeratins (cocktail of clone AE1/AE3; Chemicon International,

Temecula, CA, USA), S100, desmin,  $\alpha$ -SMA (clone 1A4), and NSE (DKO, Glostrup, Denmark). In the case of cytokeratins, desmin and NSE, sections were subjected to heat-induced antigen retrieval for 20 min at 120 °C in citrate buffer before addition of the primary antibody. Staining was carried out using the REAL™ EnVision™ Detection System, peroxidase/DAB+, rabbit/mouse (DKO). The samples were observed by optical microscopy (AX70, Olympus).

### **Microarray analysis**

The microarrays were scanned using a GeneChip Scanner 3000 7G (Affymetrix), and the raw image files were converted into normalized signal intensity values using MAS5 algorithm in Affymetrix Expression Console software. The fold change in signal intensity between different samples was calculated for each probe. As a threshold to identify candidate differentially expressed probes, the 2-fold change in signal was used in this study, and 4,453 probes were finally selected. Two-dimensional hierarchical cluster analysis of selected probes and samples was performed to generate a heat map, using two fold change. The distance between every pair of probes was calculated as  $1.0 - (\text{Pearson's correlation coefficient in signal between the 2 probes})$ . The Ward's linkage algorithm was used for cluster analysis.

### **Reverse transcription PCR**

Total RNA was isolated using the RNeasy Mini Kit (Qiagen) and subjected to cDNA synthesis using superscript III First-Strand Synthesis System for RT-PCR (Invitrogen). Individual primers were designed for the target genes as follows. The following (forward and reverse) primer pairs were used:  $\beta$ -ACTIN: 5'-TCCTGACCCTSAAGTACCCC-3' and 5'-GTGGTGGTGAAGCTGTAGCC-3', DPPA4: 5'-AGAGGATCAGCAGGCTTCTA-3' and 5'-GTGTCTCAGAACTTTGCAGG-3', SALL1: 5'-GCTGCTGCAGACACAAGATC-3' and 5'-CTCATCATGAATGACAGCGA-3', LIN28: 5'-ATGGGGTTTCGGCTTCCTGTC-3' and

5'-GCTTGCAATCCTTGGCATGA-3', CD30: 5' -TGTGCATGGAACCTCTCCC-3' and 5'-TTAGAAGCAGCTTCCTGGGC-3', CD45: 5'-GGAGACCATTGGTGACTTTTG-3' and 5'-CCATACGTTTGCTTTCTTCTC-3', c-KIT: 5'-TGAAGCATTCCCCAAACCTGAACA-3' and 5'-GGTGTGGGGATGGATTTGCTCTTT-3', end-OCT3/4: 5'-CAAGCGATCAAG CAGTGAC-3' and 5'-CTTCCCTCTAACCAGTTGCC-3', end-SOX2: 5'-AAGATGGCC CAGGAGAACC-3' and 5'-CGTAGCTTTCTTTCTCCAGAT-3', end-KLF4: 5'-TCCCATCTCAAGGCACACC-3' and 5'-CCACAACCTCCAGTCACCC-3', end-c-MYC: 5'-CTCGGACACCGAGGAGAATG-3' and 5'-CAGCCAAGGTTGTGAGGTTGC-3', exo-OCT3/4: 5'-TGTCTCCGTCACCACTCTGG-3', exo-SOX2: 5'-TGTCCCAGCACTACCAGAG-3', exo-KLF4: 5'-GACCACCTCGCCTTACACAT-3', exo-c-MYC: 5'-CTCCTGGCAAAAGGTCAGAG-3' and IRES2: 5'-TGCTTC CTTACGACATTCA-3', ZFH4: 5'- GGCAACCCTGTTACCTAAA-3' and 5'- CCTTCTGCCTCCTCACTTTG -3', NFIX: 5'- GATGCAGAACTGCCTTCTC -3' and 5'- GGACTGTACAGAGGGGTCCA -3', HOXC8: 5'- CCGAAGGATGAAGTGGAAAA-3' and 5'- GGGCAAGGAGTGAGACAGAG-3', CXORF67: 5'- TCACCCTGGTAGCTTCTGCT -3' and 5'- CTCATCAGCTGACCCAGACA-3', STMN2: 5'- ACGTCTGCAGGAAAAGGAGA -3' and 5'- GACATGGGGAGCTTCAAAAA -3' .

### ***In vitro* differentiation of induced pluripotent stem cells(iPSCs)**

Neural cell differentiation from human ESCs or ARCs was performed an *in vitro* differentiation assay based on the protocol<sup>(2)</sup>. Briefly, single cells were harvested by trypsinization, and  $1 \times 10^6$  cells were cultured on low-adhesion plates in ESC medium (day 0). Half of the medium was refreshed every day, and embryoid bodies (EBs) were allowed to grow up for 4 days in suspension before culture in DMEM/F12 containing N2 supplement (Gibco, Carlsbad, CA, USA), NEAA and heparin (Mochida Pharmaceuticals, Tokyo, Japan) for days 4–6. EBs were then transferred onto laminin-coated plates in the same medium containing retinoic acid, and

cultured for 4 days (days 6–10). The cells were fixed and stained with antibodies against nestin (Millipore, Tokyo, Japan) on day 10. The samples were observed by immunofluorescence microscopy (BZ-9000, Keyence, Osaka, Japan). Cardiomyocyte differentiation was induced using the PSdif-myocyte Differentiation Kit (StemRD, Burlingame, CA, USA) according to the manufacturer's protocol. Hepatic cell differentiation was performed as described previously<sup>(3)</sup>. Briefly, after EB formation for 7 days, cells were transferred onto 35-mm plates and cultured for a further 14 days. The cells were then fixed and stained with antibodies against albumin (Bethel Laboratories, Montgomery, TX, USA).

### **Western blotting**

Western blotting was performed as described previously<sup>(4)</sup>. The primary antibodies used were anti-OCT3/4 antibody (Santa Cruz Biotechnology), anti-SOX2 antibody (Santa Cruz Biotechnology), anti-c-MYC antibody (Santa Cruz Biotechnology), anti- $\beta$ -ACTIN antibody (Santa Cruz Biotechnology), and anti-KLF4 antibody (Abcam, Cambridge, UK).

### **Genomic PCR**

Genomic DNA was isolated using the DNeasy® Blood and Tissue Kits (Qiagen). Individual (forward and reverse) primer pairs were designed for the target genes as follows: OCT3/4: 5'-GCTCTCCCATGCATTCAAAC-3', SOX2: 5'-CACTGCCCTCTCACACATG-3', KLF4: 5'-TACACATGAAGAGGCATTTT-3', c-MYC: 5'-CTACGGA ACTCTTGTGCG-3' and IRES2: 5'-TGCTTC CTTCACGACATTCA-3'.

### **Inverse PCR**

Inverse PCR was performed as described previously<sup>(5)</sup>. The following (forward and reverse) primer pairs were used: Forward: 5'-CTCTGGTTTCCCTTTCGCTT-3' and Reverse: 5'-TTGGAGACCTCT CAGCCTGA-3' (OCT3/4), 5'-GACAGTTACGCGCACATGAA-3'

(SOX2), 5'-CCCTACCTCGGAGAGAGACC-3' (KLF4),  
5'-CTGGGAGGAGACATGGTGAAC-3' (c-MYC), for PCR using PstI-digested genome as  
templates, and forward: 5'-CTCTGGTTTCCCTTTCGCTT-3' and  
5'-TTCACCTGCACTGTACTCCTC-3' (OCT3/4), 5'-CATGTCCCAGCACTACCAGA-3'  
(SOX2), 5'-GACCACCTCGCCTTACACAT-3' (KLF4), and  
5'-TACATCCTGTCCGTCCAAGC-3' (c-MYC), for PCR using EcoRI-digested genome as  
templates.

### **MTS assay**

The concentration of chemicals causing 50% growth inhibition (IC<sub>50</sub>) was determined by MTS assay. *In vitro* cell viability of CM DGs was assessed using the Cell Titer 96 Aqueous Non-Radioactive Cell Proliferation Assay (Promega, Madison, WI, USA), following the manufacturer's instruction.

## References

- 1 Sugawara A, Goto K, Sotomaru Y, Sofuni T, Ito T. Current status of chromosomal abnormalities in mouse embryonic stem cell lines used in Japan. *Comparative Medicine*. 2006; **56**: 31-4.
- 2 Li XJ, Du ZW, Zarnowska ED, et al. Specification of motoneurons from human embryonic stem cells. *Nature Biotechnology*. 2005; **23**: 215-21.
- 3 Liao JY, Marumoto T, Okano S, et al. Inhibition of PTEN Tumor Suppressor Promotes the Generation of Induced Pluripotent Stem Cells. *Blood*. 2011; **118**: 1349-.
- 4 Marumoto T, Tashiro A, Friedmann-Morvinski D, et al. Development of a novel mouse glioma model using lentiviral vectors. *Nature Medicine*. 2009; **15**: 110-6.
- 5 Tian Y, Kobayashi S, Ohno N, et al. Leukemic T cells are specifically enriched in a unique CD3(dim) CD7(low) subpopulation of CD4(+) T cells in acute-type adult T-cell leukemia. *Cancer science*. 2011; **102**: 569-77.
